# Supplementary material
Source: PubMed Central journal article supplement (PMC4011663)
Supplement: NIHMS563316-supplement-supplemental_file.pdf [file NIHMS563316-supplement-supplemental_file.pdf]

**Supplemental Table 1.** Patient characteristics for samples for TLR1, 2 and 6 RNA expression analysis (N=103).

| <b>Characteristics</b>               |                                            | <b>No. of Patients</b> | <b>%</b> |
|--------------------------------------|--------------------------------------------|------------------------|----------|
| <b>Age, years</b>                    |                                            |                        |          |
|                                      | Median                                     | 68                     |          |
|                                      | Range                                      | 33-92                  |          |
| <b>Sex</b>                           |                                            |                        |          |
|                                      | Male                                       | 59                     | 57%      |
|                                      | Female                                     | 44                     | 43%      |
| <b>BM blast, %</b>                   |                                            |                        |          |
|                                      | Median                                     | 4                      |          |
|                                      | Range                                      | 0-26                   |          |
| <b>WBC, X10<sup>9</sup>/ L</b>       |                                            |                        |          |
|                                      | Median                                     | 4                      |          |
|                                      | Range                                      | 1-83.5                 |          |
| <b>Hemoglobin, g/dL</b>              |                                            |                        |          |
|                                      | Median                                     | 10                     |          |
|                                      | Range                                      | 6.4-15                 |          |
| <b>Platelet, X10<sup>9</sup>/ L</b>  |                                            |                        |          |
|                                      | Median                                     | 74                     |          |
|                                      | Range                                      | 4-1040                 |          |
| <b>Neutrophil, X10<sup>9</sup>/L</b> |                                            |                        |          |
|                                      | Median                                     | 50                     |          |
|                                      | Range                                      | 5- 94                  |          |
| <b>Dx</b>                            |                                            |                        |          |
|                                      | 5q-<br>RA/ RARS/ RCMD/ RCMD-/ Rs/<br>MDS-U | 2                      | 1.9%     |
|                                      | RAEB                                       | 46                     | 44.7%    |
|                                      | RAEBT                                      | 36                     | 35.0%    |
|                                      | CMML                                       | 4                      | 3.9%     |
|                                      |                                            | 15                     | 14.6%    |
| <b>IPSS</b>                          |                                            |                        |          |
|                                      | H                                          | 10                     | 9.9%     |
|                                      | I-2                                        | 23                     | 22.8%    |
|                                      | I-1                                        | 39                     | 38.6%    |
|                                      | L                                          | 29                     | 28.7%    |
|                                      | NA                                         | 2                      |          |
| <b>Cytogenetic</b>                   |                                            |                        |          |
|                                      | Dip, -Y                                    | 70                     | 68.6%    |
|                                      | 5/ 7-                                      | 17                     | 16.7%    |
|                                      | Other                                      | 14                     | 13.7%    |
|                                      | IM                                         | 1                      | 1.0%     |
|                                      | ND                                         | 1                      |          |

**Supplemental Table 2.** Patient characteristics for samples for TLR2-F217S sequencing (N=149).

| <b>Characteristics</b>               |                                  | <b>No. of Patients</b> | <b>%</b> |
|--------------------------------------|----------------------------------|------------------------|----------|
| <b>Age, years</b>                    |                                  |                        |          |
|                                      | Median                           | 69                     |          |
|                                      | Range                            | 28-89                  |          |
| <b>Sex</b>                           |                                  |                        |          |
|                                      | Male                             | 99                     | 66       |
|                                      | Female                           | 50                     | 34       |
| <b>BM blast, %</b>                   |                                  |                        |          |
|                                      | Median                           | 7                      |          |
|                                      | Range                            | 0-52                   |          |
| <b>WBC, X10<sup>9</sup>/L</b>        |                                  |                        |          |
|                                      | Median                           | 3                      |          |
|                                      | Range                            | 0.7-116.1              |          |
| <b>Hemoglobin, g/dL</b>              |                                  |                        |          |
|                                      | Median                           | 10                     |          |
|                                      | Range                            | 6.8-15                 |          |
| <b>Platelet, X10<sup>9</sup>/L</b>   |                                  |                        |          |
|                                      | Median                           | 68                     |          |
|                                      | Range                            | 1-954                  |          |
| <b>Neutrophil, X10<sup>9</sup>/L</b> |                                  |                        |          |
|                                      | Median                           | 49                     |          |
|                                      | Range                            | 0-96                   |          |
| <b>Ferritin, ug/L</b>                |                                  |                        |          |
|                                      | Median                           | 574                    |          |
|                                      | Range                            | 11-21197               |          |
| <b>Dx</b>                            |                                  |                        |          |
|                                      | 5q-                              | 3                      | 2        |
|                                      | RA/ RARS/ RCMD/ RCMD-/ Rs/ MDS-U | 57                     | 38       |
|                                      | RAEB                             | 63                     | 42       |
|                                      | RAEBT                            | 8                      | 5        |
|                                      | CMML                             | 18                     | 12       |
| <b>IPSS</b>                          |                                  |                        |          |
|                                      | H                                | 16                     | 11       |
|                                      | I-2                              | 44                     | 30       |
|                                      | I-1                              | 50                     | 34       |
|                                      | L                                | 37                     | 25       |
|                                      | NA                               | 2                      | 1        |
| <b>Cytogenetic</b>                   |                                  |                        |          |
|                                      | Dip, -Y                          | 91                     | 61       |
|                                      | 5/ 7-                            | 31                     | 21       |
|                                      | Other                            | 23                     | 15       |
|                                      | IM                               | 4                      | 3        |



**Supplemental Table 3. Patient characteristics for BM CD34+ cells used for TLR2 inhibition**

| <b>sample ID</b>      | <b>Age</b> | <b>Sex</b> | <b>Race</b> | <b>CG Group</b> | <b>IPSS</b> | <b>BM BL</b> | <b>WBC</b> | <b>Plt</b> | <b>Hgb</b> | <b>Neut</b> |
|-----------------------|------------|------------|-------------|-----------------|-------------|--------------|------------|------------|------------|-------------|
| <b>lower-risk #1</b>  | 73         | M          | W           | Dip             | INT-1       | 5            | 2.1        | 108        | 10         | 36          |
| <b>lower-risk #2</b>  | 79         | F          | W           | -5/5q-          | Low         | 2            | 2.2        | 277        | 9.9        | 68          |
| <b>lower-risk #3</b>  | 78         | M          | W           | Dip             | Low         | 2            | 4          | 126        | 11.1       | 31          |
| <b>lower-risk #4</b>  | 66         | M          | W           | Dip             | Low         | 3            | 5.4        | 52         | 13.7       | 63          |
| <b>higher-risk #1</b> | 80         | M          | W           | Mis             | High        | 19           | 63.5       | 33         | 8.1        | 20          |
| <b>higher-risk #2</b> | 81         | F          | W           | +8              | INT-2       | 10           | 2.2        | 123        | 9.4        | 29          |
| <b>higher-risk #3</b> | 64         | M          | W           | Dip             | INT-2       | 15           | 3.6        | 24         | 10.4       | 37          |

A

| GENE | chr  | location (hg18) | SNP     | sample ID |
|------|------|-----------------|---------|-----------|
| TLR2 | chr4 | 154845515       | CCC-CTC | WBM40     |
| TLR2 | chr4 | 154845415       | AGC-CGC | WBM51     |
| TLR2 | chr4 | 154844159       | TTT-TCT | WBM57     |
| TLR4 | chr9 | 119515069       | TGC-TAC | WBM69     |

B

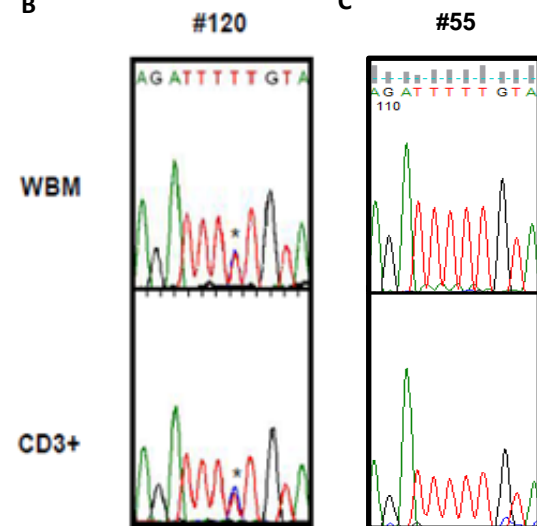

C

D

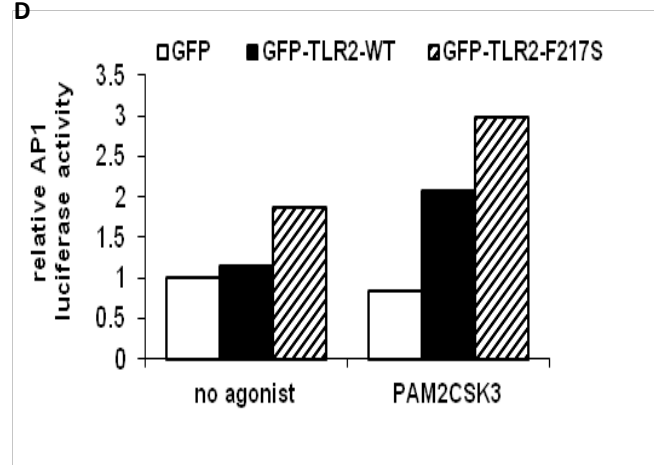

E

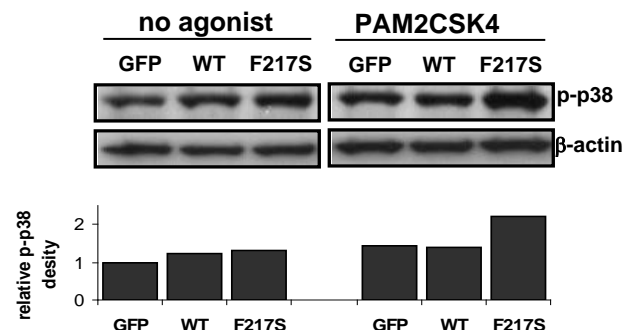

**Figure S1. Mutational analysis of TLRs in MDS.** (a) Identification of three rare SNPs of TLR1 and one rare SNP of TLR4 by captured deep sequencing in MDS BM-MNCs. (b) The presence of TLR2-F217S in both BM-MNC and BM-CD3+ cells of one case of MDS. (c) Lack of TLR2-F217S in BM-MNC or BM-CD3+ cells of another case of MDS. (d) Luciferase analysis of activation of AP1 by WT and F217S TLR2 in transfected 293T cells. Cells were exposed to either no agonist or to PAM2CSK4. (e) Western blot characterization of p38 phosphorylation in 293T cells transfected with either WT or F217S TLR2 and treated with no agonist, MALP2 or PAM2CSK4. Top, Western blot analysis of p-p38; Bottom, Quantification of p-p38 band densities.

A

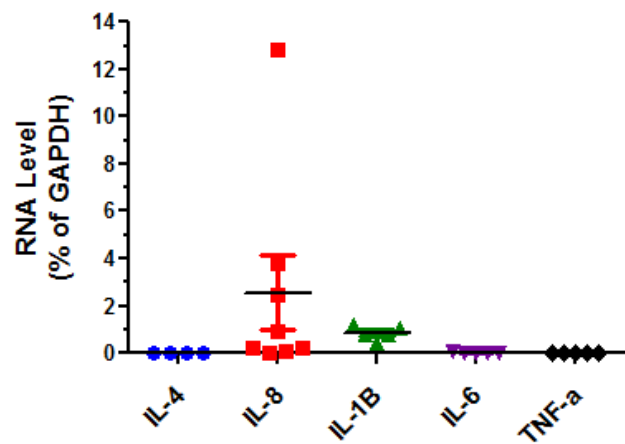

B

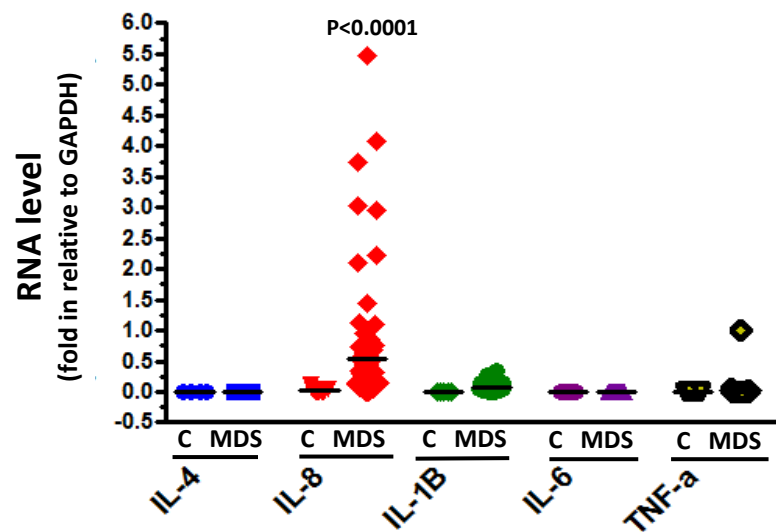

**Figure S2. Overexpression of IL-8 in MDS BM CD34+ cells.** (a) Q-RTPCR analysis of multiple genes of inflammatory cytokines in normal BM CD34+ cells. (b) Q-RTPCR analysis of multiple genes of inflammatory cytokines in MDS BM CD34+ cells in comparison to controls.

A

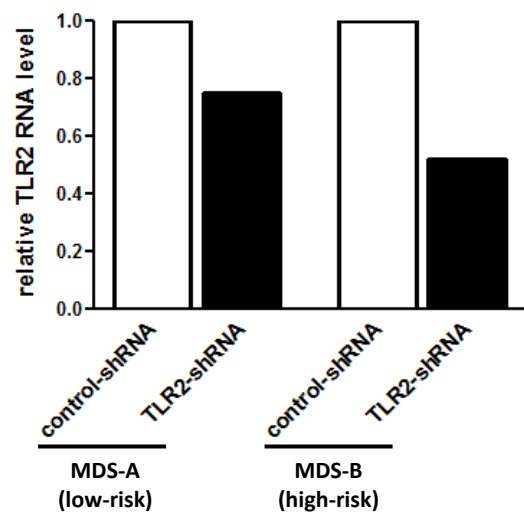

B

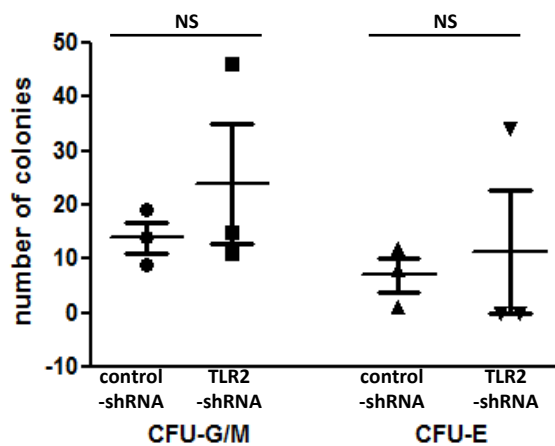

**Figure S3. Inhibition of TLR2 in primary MDS BM CD34+ cells.** (a) Q-PCR analysis of TLR2 RNA expression after transduction of shRNA into two primary MDS BM CD34+ cells. (b) Methocult medium supported colony formation assays revealed no significant difference for the formation of CFU-G/M or CFU-E in BM CD34+ cells of higher-risk MDS (intermediate-2 and high-risk) two weeks after transduction of TLR2-shRNA and control shRNA.

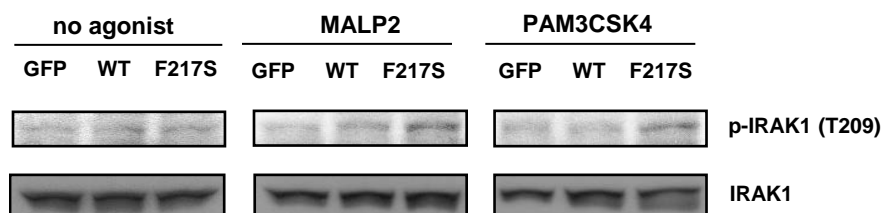

**Figure S4.** Western blot characterization of IRAK1 phospho-T209 in 293T cells transfected with either WT or F217S TLR2 and treated with no agonist, MALP2 or PAM3CSK4. Top, Western blot analysis of p-T209 of IRAK1; Bottom, Western blot analysis of IRAK1.
